# Supplementary material for: Identification and Characterization of the Interaction Site between cFLIPL and Calmodulin
Source: PLOS journal article supplement (doi:10.1371/journal.pone.0141692), 2015-11-03
Supplement: S6 (10.1371/journal.pone.0141692.s006) [file journal.pone.0141692.s006]

|                                         |                 |
|-----------------------------------------|-----------------|
| <b>NOE restraints</b>                   | 80              |
| Intra-residue                           | 36              |
| Sequential                              | 23              |
| Medium range ( $ i - j  \leq 4$ )       | 21              |
| Long range ( $ i - j  > 4$ )            | 0               |
| RMSD from experiment (Å)                | $1.16 \pm 0.32$ |
| <b>Structure statistics</b>             | 21 structures   |
| <b>NOE violations</b>                   |                 |
| Average overall violation (Å)           | $0.32 \pm 0.53$ |
| Average intra-residue violation (Å)     | $0.14 \pm 0.33$ |
| Average sequential violation (Å)        | $0.40 \pm 0.50$ |
| Average medium range violation (Å)      | $0.54 \pm 0.69$ |
| <b>Ramachandran analysis</b>            |                 |
| Most favored regions (%)                | 58.10           |
| Additional allowed regions (%)          | 32.90           |
| Generously allowed regions (%)          | 8.60            |
| Disallowed regions (%)                  | 0.50            |
| <b>Average pairwise RMSD*</b>           |                 |
| Overall (Å)                             | 1.41            |
| Secondary structure (residues 5-10) (Å) | 0.83            |

Statistics obtained from AQUA3.2 and PROCHECK-NMR analyses.

\* RMSDs computed in UCSF Chimera.
